# Supplementary material for: Formen der Arbeitszufriedenheit sensu Bruggemann
Source: Atypon-hosted journal article supplement (doi:10.1026/0932-4089/a000430), 2024-04-03
Supplement: 0932-4089_a000430_esm1.pdf [file 0932-4089_a000430_esm1.pdf]

## ESM 1

### **Hypothesen zu Unterschieden bezüglich der Strategien im Umgang mit Problemen bei der Arbeit bei AZ-Formen für die laut Modell Problemlöseversuchen keine Rolle spielen**

Jenseits der Modellannahmen zum unterschiedlichen Umgang mit Problemen bei einem Festhalten am ursprünglichen Anspruchsniveau trotz eines negativen Soll-Ist-Vergleichs (fixierte und konstruktive AUZ) sind Probleme ein wohl unvermeidbarer Teil im Arbeitsleben von mehr oder weniger allen arbeitstätigen Menschen. Es stellt sich daher die Frage, inwieweit sich die weiteren AZ-Formen in Bezug auf die verschiedenen Strategien des EVLN-Ansatzes voneinander bzw. von konstruktiver und fixierter AUZ unterscheiden (Unterhypothesen 4b bis 8f). Wir orientierten uns diesbezüglich an der Unterscheidung zwischen konstruktiven Strategien (Considerate Voice und Loyalty) und destruktiven Strategien (Neglect, Aggressive Voice und Exit) und drei Gruppen von AZ-Formen. Demnach sollten resignativ Zufriedene, deren Zufriedenheit vor dem Hintergrund eines negativen Soll-Ist-Vergleichs aus einer Anspruchsniveausenkung resultiert, weniger zu konstruktiven und stärker zu destruktiven Strategien tendieren als die beiden aus einem günstigen Ausgang des Soll-Ist-Vergleichs hervorgehenden AZ-Formen. Entsprechende Unterschiede sollten sich daher sowohl zwischen resignativer AZ und stabilisierter AZ (Unterhypothesen 4b bis 8b) als auch zwischen resignativer AZ und progressiver AZ (Unterhypothesen 4c bis 8c) zeigen. Zwischen stabilisierter und progressiver AZ haben wir keine Unterschiede in der Verwendung der Strategien erwartet (Unterhypothesen 4d bis 8d).

Resignativ Zufriedene sollten jedoch stärker zu konstruktiven und weniger zu destruktiven Strategien tendieren als konstruktiv und fixiert Unzufriedene, die an ihrem Anspruchsniveau trotz negativem Soll-Ist-Vergleich festhalten. Dementsprechende Unterschiede sollten sich daher sowohl zwischen resignativer AZ und fixierter AUZ (Unterhypothesen 4e bis 8e) als auch zwischen resignativer AZ und konstruktiver AUZ (Unterhypothesen 4f bis 8f) finden lassen.

## **Ergebnisse zu Unterschieden hinsichtlich der Strategien im Umgang mit Problemen bei der Arbeit bei AZ-Formen, für die Problemlöseversuche laut Modell keine Rolle spielen**

Hinsichtlich der AZ-Formen, für die der dritte Schritt (Problemlöseversuche) laut Modell keine Rolle spielt (resignative, progressive und stabilisierte AZ) erbrachten die geplanten Kontraste die folgenden Ergebnisse (s. Tabelle 4 in ESM 2 und Abbildung 2 in ESM 3).

In Übereinstimmung mit den Unterhypothesen 4d bis 8d unterschieden sich stabilisiert und progressiv Zufriedene bei keiner der fünf Strategien. In Bezug auf die postulierten Unterschiede zwischen resignativ Zufriedenen und stabilisiert bzw. progressiv Zufriedenen, zeigten sich hypothesenkonforme Ergebnisse bei jeweils 4 der 5 Strategien. Wie erwartet (Unterhypothesen 4b, 4c, 7b, 7c, 8b, 8c) zeigte sich, dass die drei destruktiven Strategien (Neglect, Aggressive Voice, Exit) von resignativ Zufriedenen mehr verwendet wurden als von stabilisiert Zufriedenen bzw. progressiv Zufriedenen. Die konstruktive Strategie Considerate Voice wurde von resignativ Zufriedenen hingegen, wie erwartet (Unterhypothesen 5b und 5c), weniger verwendet als von stabilisiert Zufriedenen bzw. progressiv Zufriedenen. Entgegen den Unterhypothesen 6b und 6c zeigte sich bei resignativ Zufriedenen keine geringere Loyalty als bei stabilisiert Zufriedenen bzw. progressiv Zufriedenen.

Der Vergleich resignativ Zufriedener mit fixiert Unzufriedenen erbrachte hypothesenkonforme Unterschiede für 4 der 5 Strategien. Wie erwartet (Unterhypothesen 4e, 6e, 7e, 8e), wurde bei resignativer AZ weniger von den drei destruktiven Strategien Neglect, Aggressive Voice und Exit, aber mehr von der konstruktiven Strategie Loyalty Gebrauch gemacht. Lediglich die ebenfalls konstruktive Strategie Considerate Voice wurde bei resignativer AZ entgegen der Unterhypothese 5e nicht häufiger verwendet als bei fixierter AUZ.

Hinsichtlich der postulierten Unterschiede zwischen resignativ Zufriedenen und konstruktiv Unzufriedenen, zeigte sich ein hypothesenkonformer Unterschied hingegen lediglich bezüglich Exit (Unterhypothese 8f). Resignativ Zufriedene verwendeten diese destruktive Strategie weniger als konstruktiv Unzufriedene. In Bezug auf die weiteren Strategien Neglect, Considerate Voice, Loyalty, und Aggressive Voice zeigten sich entgegen den Unterhypothesen 4f bis 7f keine Unterschiede. Weder wurden die beiden verbleibenden destruktiven Strategien Neglect und Aggressive Voice bei resignativer AZ seltener noch die beiden konstruktiven Strategien Considerate Voice und Loyalty häufiger verwendet als bei konstruktiver AUZ.
